# Supplementary material for: A functional RNA/DNA circuit for one-pot detection of SARS-CoV-2 RNA
Source: Royal Society of Chemistry journal article supplement (doi:10.1039/d2cc05251b), 2022-01-01
Supplement: d2cc05251b1.pdf [file d2cc05251b1.pdf]

1  
2  
3  
4  
5  
6  
7  
8  
9  
10  
11  
12  
13  
14  
15  
16  
17  
18  
19  
20  
21  
22  
23  
24  
25  
26

## Supplementary Information

### A functional RNA/DNA circuit for one-pot detection of SARS-CoV-2 RNA

Dayong Li<sup>a</sup>, Wenting Cheng<sup>a</sup>, Zhiqiang Hou<sup>a</sup>, Chengjie Duan<sup>a</sup>, Yanheng Yao<sup>a</sup>, Yan  
Chen<sup>a</sup>, Gang Yang<sup>b,\*</sup>, Zhouxiang Cheng<sup>c,\*</sup>, Yang Xiang<sup>a,d,\*</sup>

<sup>a</sup> State Key Laboratory of Pharmaceutical Biotechnology, School of Life Sciences,  
Nanjing University, Nanjing 210023, People's Republic of China

<sup>b</sup> Pulmonary and Critical Care Department, Wuhu Hospital of East China Normal  
University, Wuhu 241000, People's Republic of China

<sup>c</sup> Center for Disease Control and Prevention, Wuhu 241000, People's Republic of China

<sup>d</sup> State Key Laboratory of Natural and Biomimetic Drugs, Peking University, Beijing  
100191, People's Republic of China

\*Corresponding authors: xiangy@nju.edu.cn (Y. Xiang); 13855306767@163.com (G  
Yang); czx6404@126.com (Z. Cheng)

27 **Materials and Reagents.**

28 All DNA sequences used in this work including FQ fluorescent reporters were  
29 synthesized by Sangon Biotech. Co. Ltd. (Shanghai, China). The RNA nucleotides were  
30 obtained from Genscript. Bio Tech (Nanjing China). Refer to Table S1 for the detailed  
31 sequence. The target RNA used in this research is a synthetic gene according to the  
32 ORF1ab fragment of the SARS-CoV-2 RNA (GenBank, NC\_045512). EnGen® Lba  
33 Cas12a (M0653T) and 10 × NEBuffer r2.1 reaction buffer (500 mM NaCl, 100 mM  
34 Tris-HCl, 100 mM MgCl<sub>2</sub>, 1000 μg/ml Recombinant Albumin, pH 7.9@25°C) were  
35 obtained from New England Biolabs (Beijing China). RNase inhibitor was bought from  
36 Takara Bio. (Dalian China). DEPC-H<sub>2</sub>O was obtained from Sangon Biotech. Co. Ltd.  
37 (Shanghai, China), and all reagents and solutions were prepared in an RNase-free  
38 environment with DEPC-treated deionized water. The Millipore purification system  
39 was used to prepare the ultrapure water required for the experiments. Human serum  
40 samples and the total RNA clinical specimens were provided by the Center for Disease  
41 Control and Prevention of Wuhu, China. The research was ratified by the scientific  
42 ethical committee of the Wuhu Hospital of East China Normal University (the project  
43 number is 2020dx2-1), and informed consent was procured in all cases.

44

45 **Apparatus.**

46 Fluorescent analysis was operated on a TECAN Infinite 200Pro sunrise microplate  
47 reader. Native polyacrylamide gel electrophoresis was operated on a Tanon EPS300  
48 electrophoresis machine. The gel imaging was operated on a CLNX GenoSens 2100  
49 imaging system.

50

51 **Native polyacrylamide gel electrophoresis.**

52 The proposed gRNA-based HCR was validated by using 12% native gel  
53 electrophoresis. The 20μL reaction system contains 100nM DNA activator (DH),  
54 100nM gRNA (RH), 10nM target RNA and 1×NEBuffer r2.1 reaction buffer. After  
55 mixing all the components, react at 37°C for 150min. After the reaction, 10μl of the  
56 reaction solution was incubated with nucleic acid dye for 3min, and then injected into

57 12% PAGE. Finally, PAGE was run at 120V for 1 hour in the electrophoresis machine  
58 (Tanon EPS300), and the result was visualized by an imaging system (CLNX GenoSens  
59 2100).

60

#### 61 **Specific protocol for detection of SARS-CoV-2 RNA.**

62 First, different concentrations of target RNA were added to a reaction system with a  
63 total volume of 50 $\mu$ L, which contained 4 $\mu$ l of 1 $\mu$ M DH, 2 $\mu$ L of 1 $\mu$ M RH, 40nM, 3 $\mu$ L  
64 of 1 $\mu$ M LbCas12a(cpf1), 300nM of fluorescent probe FQ Reporter, and 1 $\times$ NEBuffer  
65 r2.1 reaction buffer (50 mM NaCl, 10 mM Tris-HCl, 10 mM MgCl<sub>2</sub>, 100  $\mu$ g/ml  
66 Recombinant Albumin, pH 7.9@25°C). Next, the reaction was carried out at 37°C for  
67 60 minutes. After the reaction, the fluorescence intensity at 525 nm (Excitation 485nm)  
68 was measured by using a microplate reader (TECAN Infinite 200Pro). In addition, it is  
69 worth noting that when detecting target RNA in human serum and saliva samples, it is  
70 necessary to add RNase inhibitor for treatment to avoid RNA degradation. Other than  
71 that, the operation steps are the same as those described above. All solutions involved  
72 in the experiments were prepared with DEPC-H<sub>2</sub>O, and all nucleotides were diluted  
73 with DEPC-treated PBS.

74

#### 75 **Extraction and RT-qPCR of SARS-COV-2 RNA from clinical samples.**

76 Total RNA was extracted from each nasopharyngeal swab sample using a nucleic  
77 acid extraction kit according to the manufacturer's instructions (Tianlong Technologies,  
78 Xian, China) and stored in nuclease-free environment at -80°C for next use. The RT-q-  
79 PCR verification of clinical samples is carried out with the 2019-nCoV nucleic acid  
80 detection kit (Daangene, Guangzhou China).

81

82

83

84

85

86

87 **Table S1.** DNA and RNA sequences used in this study.

| Name                            | Sequence (5' to 3')                                                          |
|---------------------------------|------------------------------------------------------------------------------|
| DH (stem 13bp)                  | ACTGAAGCATGGGTTCGCGGAGTTGCAA <b>ACTTGA</b><br>GCAACTCCGCGAA                  |
| DH (stem 14bp)                  | ACTGAAGCATGGGTTCGCGGAGTTGCAA <b>ACTTGA</b><br>GCAACTCCGCGAAC                 |
| DH (stem 15bp)                  | ACTGAAGCATGGGTTCGCGGAGTTGCAA <b>ACTTGA</b><br>GCAACTCCGCGAACC                |
| DH (stem 16bp)                  | ACTGAAGCATGGGTTCGCGGAGTTGCAA <b>ACTTGA</b><br>GCAACTCCGCGAACCC               |
| RH (stem 12bp)                  | UAAUUUCUACUAAGUGUAGAUCAACUCCGCGAA<br>CCCAUGCUUCUUCGCGGAGUUGCUCAAGUUUG        |
| RH (stem 13bp)                  | UAAUUUCUACUAAGUGUAGAUCAACUCCGCGAA<br>CCCAUGCUUCGUUCGCGGAGUUGCUCAAGUUUG       |
| RH (stem 14bp)                  | UAAUUUCUACUAAGUGUAGAUCAACUCCGCGAA<br>CCCAUGCUUCGGUUCGCGGAGUUGCUCAAGUUU<br>G  |
| RH (stem 15bp)                  | UAAUUUCUACUAAGUGUAGAUCAACUCCGCGAA<br>CCCAUGCUUCGGGUUCGCGGAGUUGCUCAAGUU<br>UG |
| Target virus RNA                | CAACUCCGCGAACCCAUGCUUCAGU                                                    |
| Single-base mismatched RNA (M1) | CAAGUCCGCGAACCCAUGCUUCAGU                                                    |
| Two-base mismatched RNA (M2)    | CAAGUCCGCGAACACAUGCUUCAGU                                                    |
| Three-base mismatched RNA (M3)  | CAAGUCCGCGAACACAUGCCUCAGU                                                    |
| miR-21                          | UAGCUUAUCAGACUGAUGUUGA                                                       |
| Fluorescence reporter (FQ)      | FAM-TTATT-BHQ1                                                               |

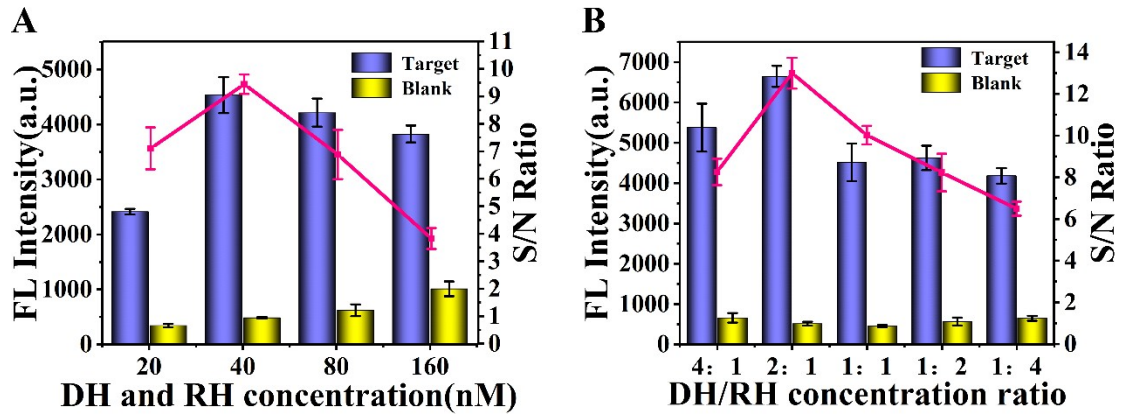

89 **DH and RH concentration(nM)**

90 **Figure S1.** Influence of the concentration of DH and RH (A) and the ratio of DH and

91 RH (B) on the performance of the method. Error bars: SD, n = 3.

92

93

94

95

96

97

98

99

100

101

102

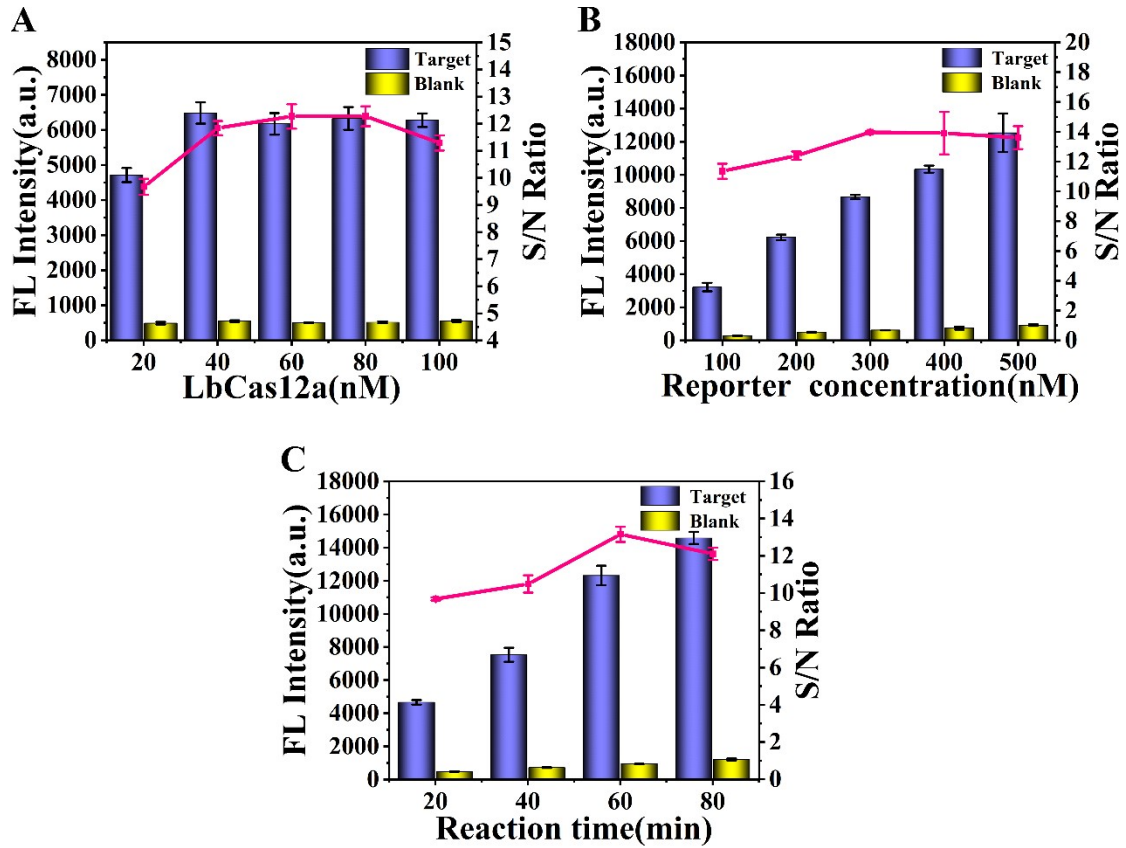

103

104 **Figure S2.** Optimization of LbCas12a protein concentration (A), FQ reporter  
 105 concentration (B), and reaction time (C). The concentration of target RNA is 1nM.

106 Error bars: SD, n = 3.

107

108

109

110

111

112

113

114

115

116

117

118

119

120

121

122

123

124

125 **Table S2.** The performance of the method in 1xNEbuffer r2.1 reaction buffer, 10%  
126 human serum and 10% saliva samples.

| <b>Sample number</b> | <b>Samples</b> | <b>Added(nM)</b> | <b>Found(nM)</b> | <b>Recovery (%)</b> | <b>RSD (%)</b> |
|----------------------|----------------|------------------|------------------|---------------------|----------------|
| 1                    | 10% Serum      | 0.1              | 0.111            | 111                 | 3.6            |
| 2                    | 10% Serum      | 1                | 0.999            | 99.9                | 3.4            |
| 3                    | 10% Saliva     | 0.1              | 0.105            | 105                 | 4.4            |
| 4                    | 10% Saliva     | 1                | 1.01             | 101                 | 6.1            |
| 5                    | Buffer         | 0.1              | 0.107            | 107                 | 6.1            |
| 6                    | Buffer         | 1                | 0.994            | 99.4                | 5.1            |

127  
128  
129  
130  
131  
132  
133  
134  
135  
136  
137  
138  
139  
140  
141  
142  
143  
144  
145  
146  
147  
148  
149  
150  
151  
152  
153  
154

155 **Table S3.** The results of RT-qPCR for clinical samples

| <b>Positive sample</b> | <b>Ct value (RT-qPCR)</b> | <b>Normal sample</b> | <b>Ct value (RT-qPCR)</b> |
|------------------------|---------------------------|----------------------|---------------------------|
| 1                      | 25.83                     | 1                    | undetected                |
| 2                      | 24.61                     | 2                    | undetected                |
| 3                      | 22.95                     | 3                    | undetected                |
| 4                      | 17.09                     | 4                    | undetected                |
| 5                      | 24.35                     | 5                    | undetected                |
| 6                      | 28.96                     | 6                    | undetected                |
| 7                      | 27.94                     | 7                    | undetected                |
| 8                      | 28.15                     | 8                    | undetected                |
| 9                      | 27.90                     | 9                    | undetected                |
| 10                     | 27.78                     | 10                   | undetected                |
| 11                     | 16.82                     | 11                   | undetected                |
| 12                     | 27.65                     | 12                   | undetected                |
| 13                     | 14.3                      | 13                   | undetected                |
| 14                     | 30.62                     | 14                   | undetected                |
| 15                     | 31.57                     | 15                   | undetected                |
| 16                     | 23.89                     | 16                   | undetected                |
| 17                     | 17.53                     | 17                   | undetected                |
| 18                     | 21.14                     | 18                   | undetected                |
| 19                     | 28.05                     | 19                   | undetected                |
| 20                     | 28.27                     | 20                   | undetected                |
| 21                     | 33.63                     | 21                   | undetected                |
| 22                     | 28.52                     | 22                   | undetected                |
| 23                     | 28.82                     | 23                   | undetected                |
| 24                     | 24.15                     | 24                   | undetected                |
| 25                     | 23.89                     | 25                   | undetected                |
| 26                     | 23.12                     | 26                   | undetected                |



---

---

|    |       |    |            |
|----|-------|----|------------|
| 27 | 31.47 | 27 | undetected |
| 28 | 21.55 | 28 | undetected |
| 29 | 23.55 | 29 | undetected |
| 30 | 24.71 | 30 | undetected |
| 31 | 25.79 | 31 | undetected |
| 32 | 36.39 | 32 | undetected |
| 33 | 24.97 | 33 | undetected |
| 34 | 26.15 | 34 | undetected |
| 35 | 20.15 | 35 | undetected |
| 36 | 18.25 | 36 | undetected |
| 37 | 22.63 | 37 | undetected |
| 38 | 22.08 | 38 | undetected |
| 39 | 19.77 | 39 | undetected |
| 40 | 24.22 | 40 | undetected |

---

---

156 Ct value  $\leq$ 40: positive; Ct value = undetected: negative

157  
158  
159  
160  
161  
162  
163  
164  
165  
166  
167  
168  
169  
170  
171  
172  
173  
174  
175  
176  
177

178

179 **Table S4.** Comparison with some reported detection strategies for SARS-CoV-2 RNA.

| <b>Method</b>    | <b>One-pot<br/>detection</b> | <b>Enzymes<br/>involved</b> | <b>Time</b> | <b>LOD</b> | <b>Reference<br/>s</b> |
|------------------|------------------------------|-----------------------------|-------------|------------|------------------------|
| Colorimetry      | No                           | 5                           | 50min       | 50 copies  | 1                      |
| Fluorescence     | No                           | 2                           | 40min       | 1.3 pM     | 2                      |
| Fluorescence     | No                           | 5                           | 50min       | 2 copies   | 3                      |
| Colorimetry      | No                           | 4                           | 141min      | 30.3 fM    | 4                      |
| Electrochemistry | No                           | 1                           | 185min      | 26 fM      | 5                      |
| Fluorescence     | Yes                          | 1                           | 60min       | 544fM      | This work              |

180

181

182

183

184

185

186

187

188

189

190

191

192

193

194

195

196

197

198 **References**

- 199 1. Y. Jiang, M. Hu, A. A. Liu, Y. Lin, L. Liu, B. Yu, X. Zhou and D. W. Pang, *ACS Sens.*, 2021, **6**,  
200 1086-1093.
- 201 2. D. Li, C. Duan, W. Cheng, Y. Gong, Y. Yao, X. Wang, Z. Wang and Y. Xiang, *Chem. Commun.*  
202 , 2022, **58**, 4484-4487.
- 203 3. Y. Zhang, M. Chen, C. Liu, J. Chen, X. Luo, Y. Xue, Q. Liang, L. Zhou, Y. Tao, M. Li, D. Wang,  
204 J. Zhou and J. Wang, *Sens. Actuators B Chem.*, 2021, **345**, 130411.
- 205 4. R. Liu, Y. Hu, Y. He, T. Lan and J. Zhang, *Chem. Sci.*, 2021, **12**, 9022-9030.
- 206 5. Y. Peng, Y. Pan, Z. Sun, J. Li, Y. Yi, J. Yang and G. Li, *Biosens. Bioelectron.*, 2021, **186**,  
207 113309.
- 208
